# Supplementary material for: Variation and Selection in the Putative Sperm-Binding Region of ZP3 in Muroid Rodents: A Comparison between Cricetids and Murines
Source: MDPI journal article supplement (doi:10.3390/genes12091450), 2021-09-20
Supplement: s1 [file s1]

**Figure S2** Bayesian inference phylogenetic tree obtained for exons 6 and 7 of *ZP3* of the studied muroid rodents, with indels coded using the SIC method. Shown are posterior probabilities for cricetid clades that were greater than 0.5. Clades and haplotypes of Cricetinae and Tylomyinae are respectively indicated by black and white circles because these two cricetid subfamilies were not monophyletic.

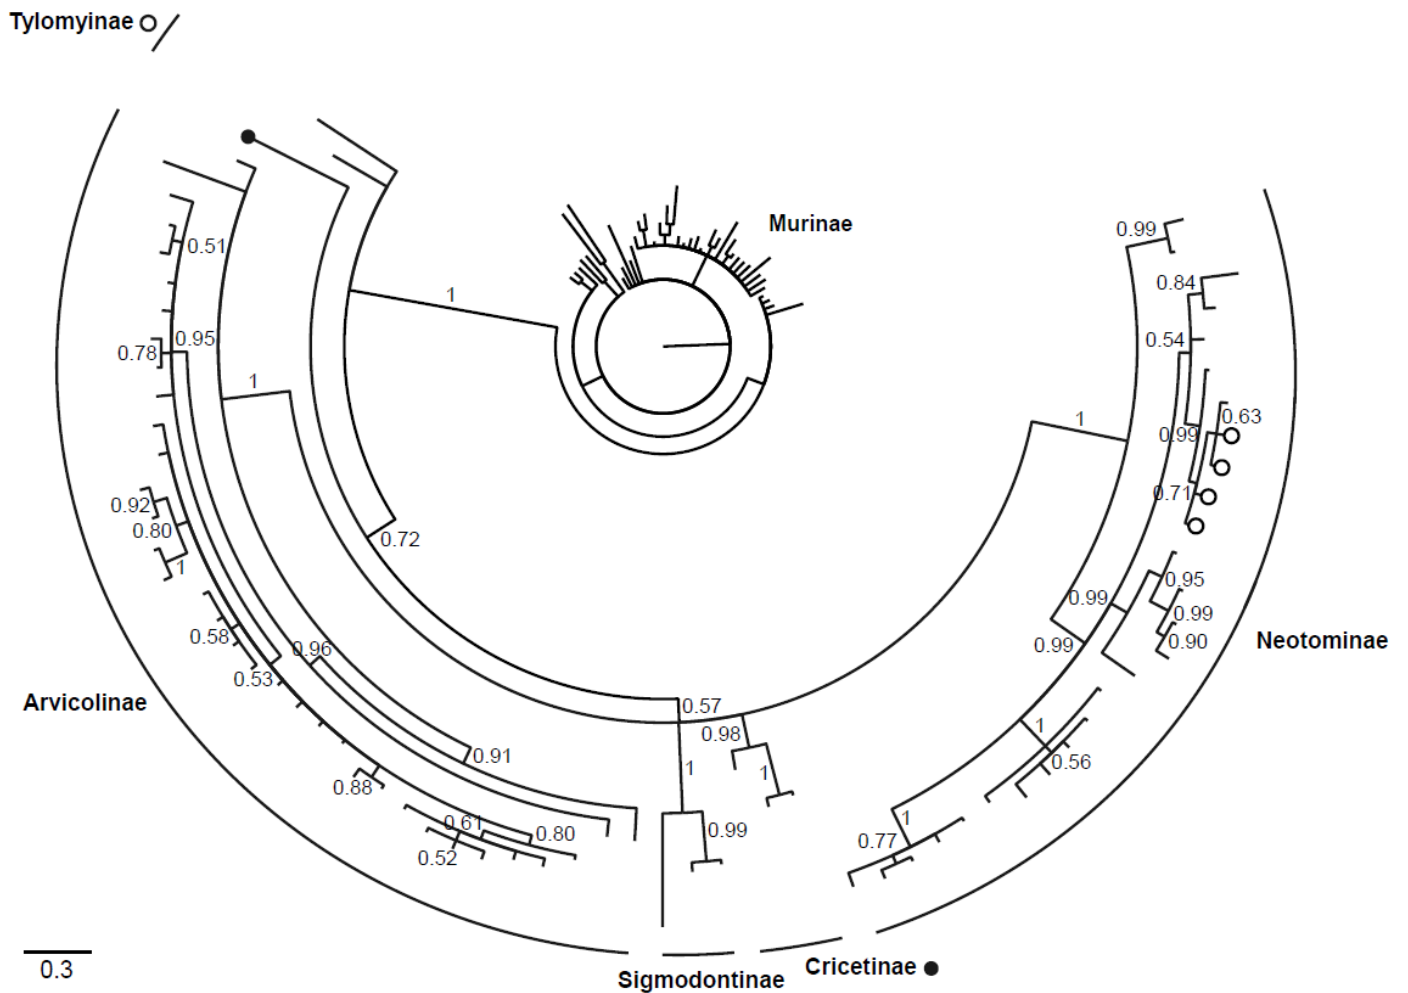

**Figure S3** Amino acid sequence logos showing patterns of conservation and variation in the putative sperm-binding region of ZP3, for different data sets: a) Cricetidae + Murinae; b) Cricetidae; c) Murinae; d) Arvicolinae; e) Cricetinae; f) Neotominae; g) Sigmodontinae; and h) Tylomyinae. The overall height of each stack indicates the sequence conservation at the position, and the height of symbols within a stack reflects the relative frequency of the corresponding amino acid at each position, with the most frequent (‘consensus’) amino acid being on top of the stack. The amino acids are represented by their one-letter codes.

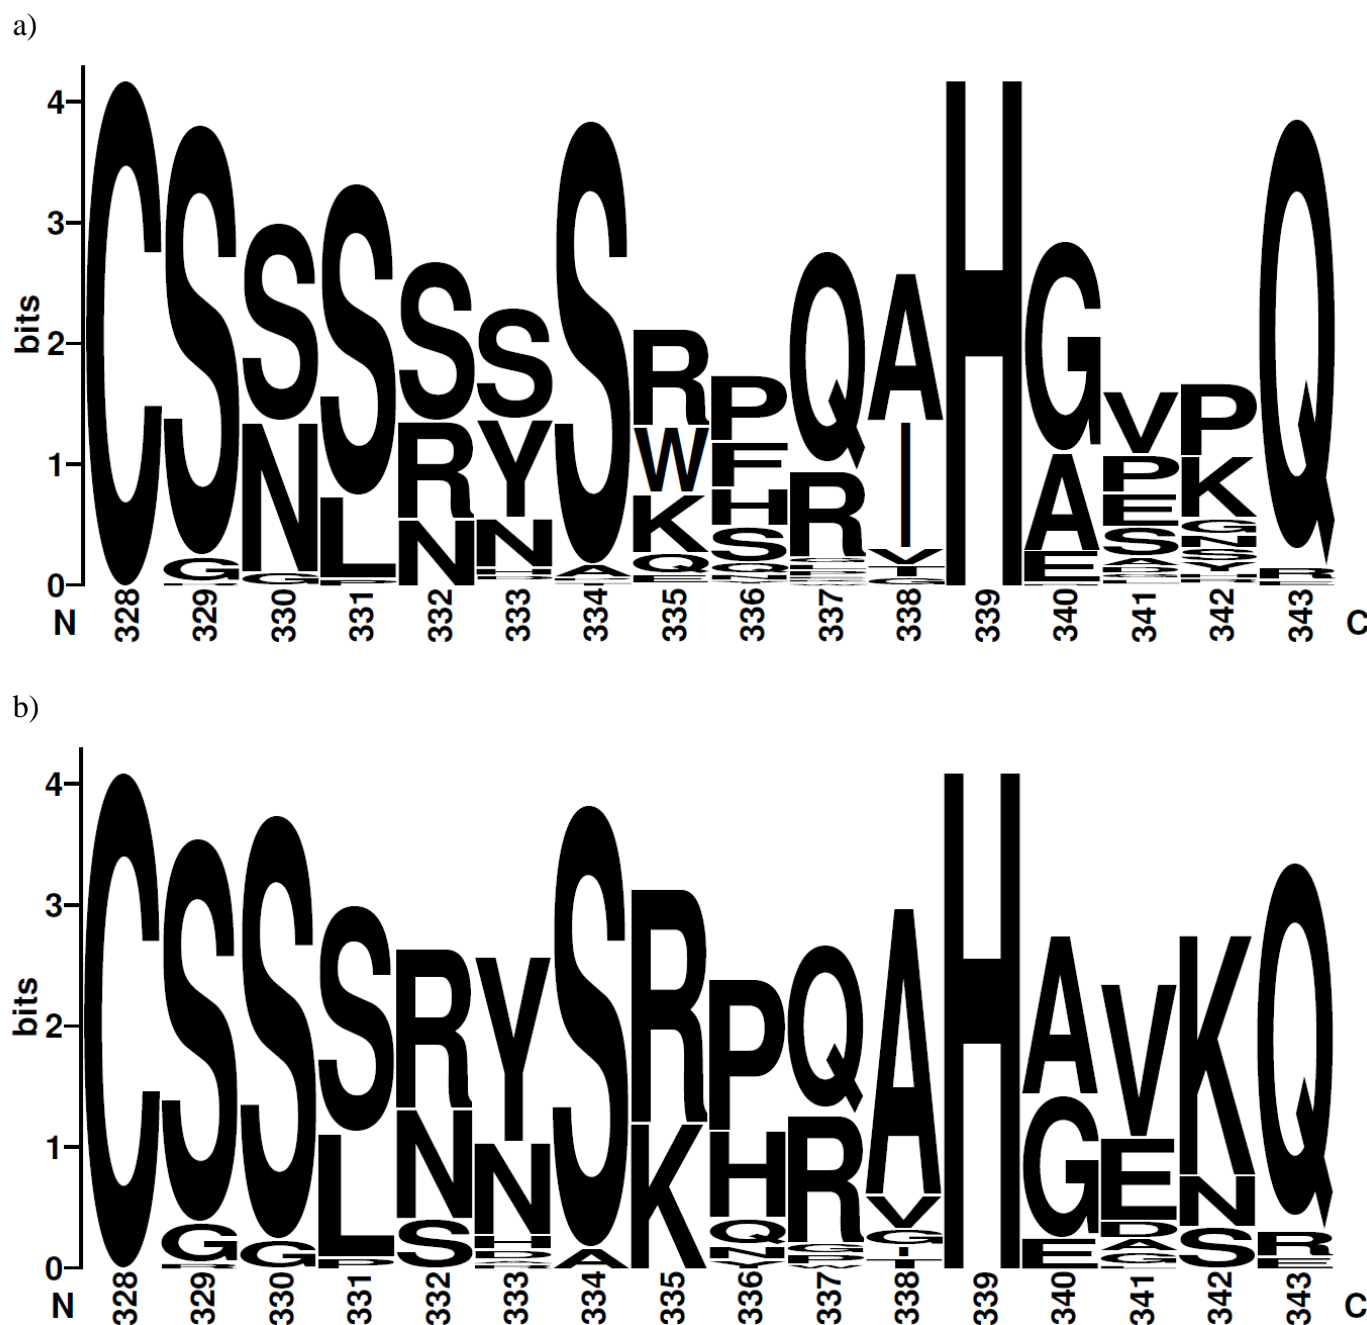

c)

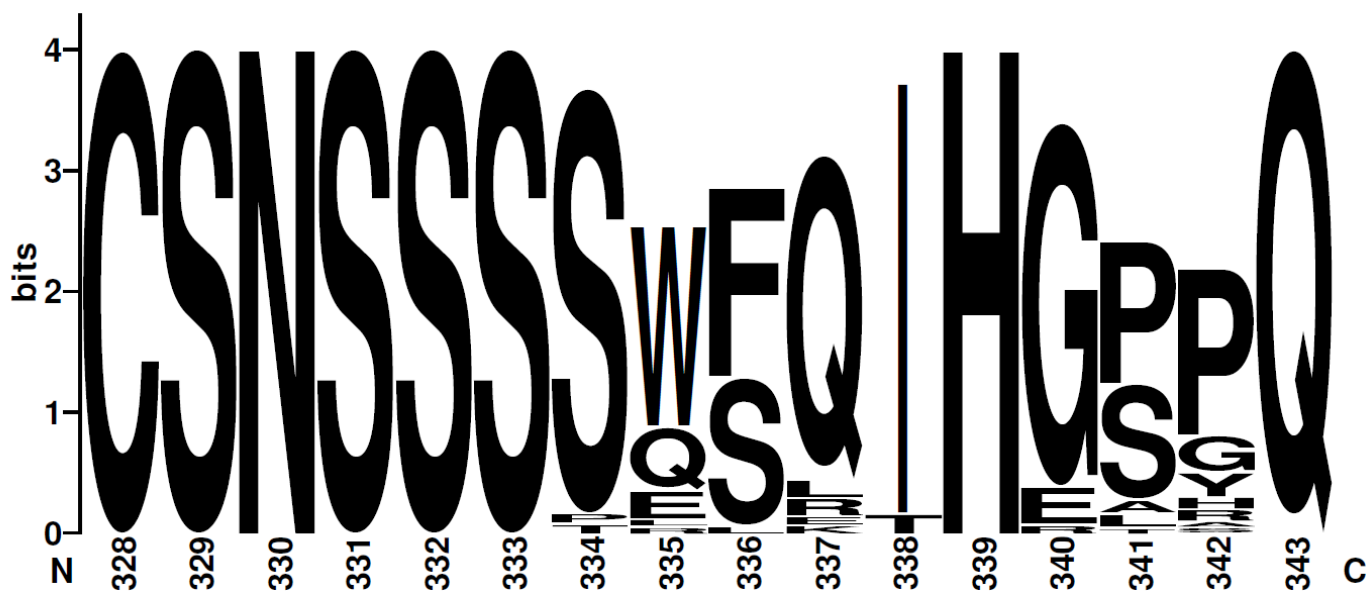

d)

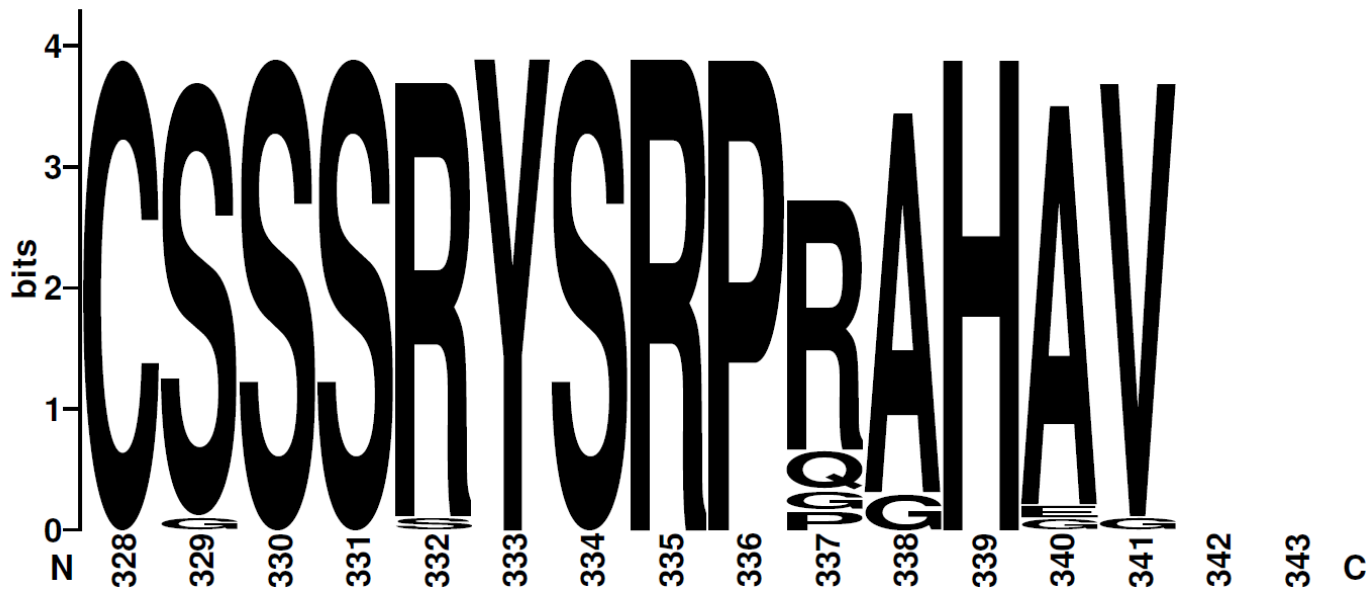

e)

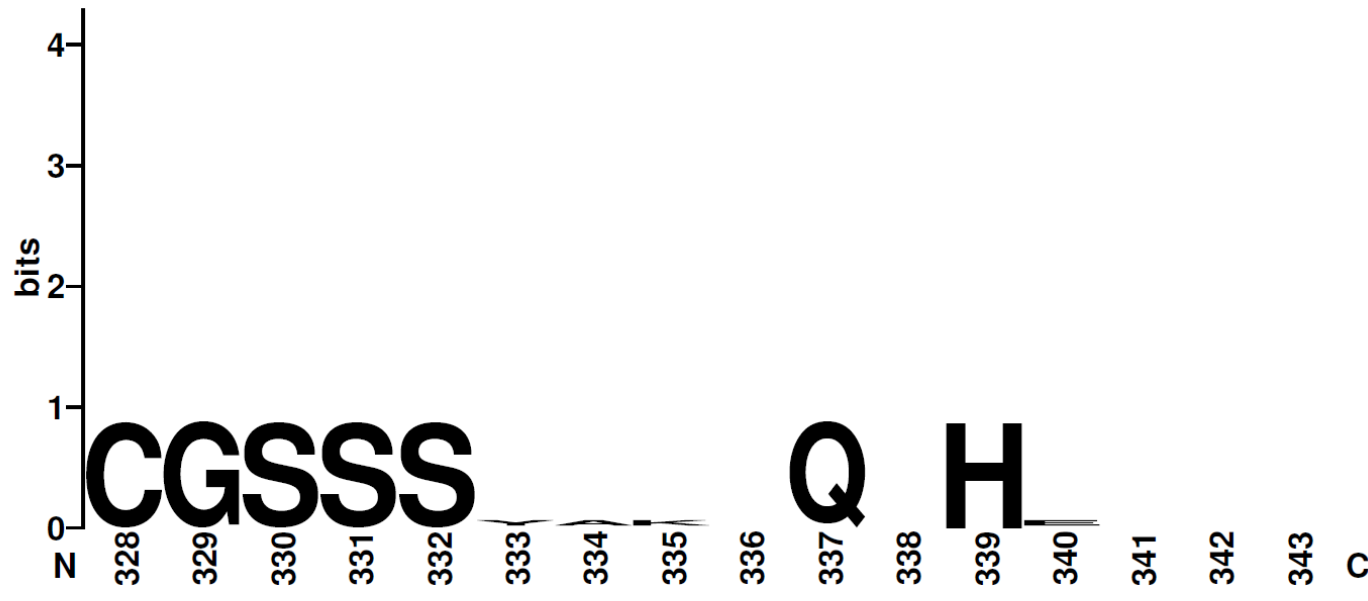

f)

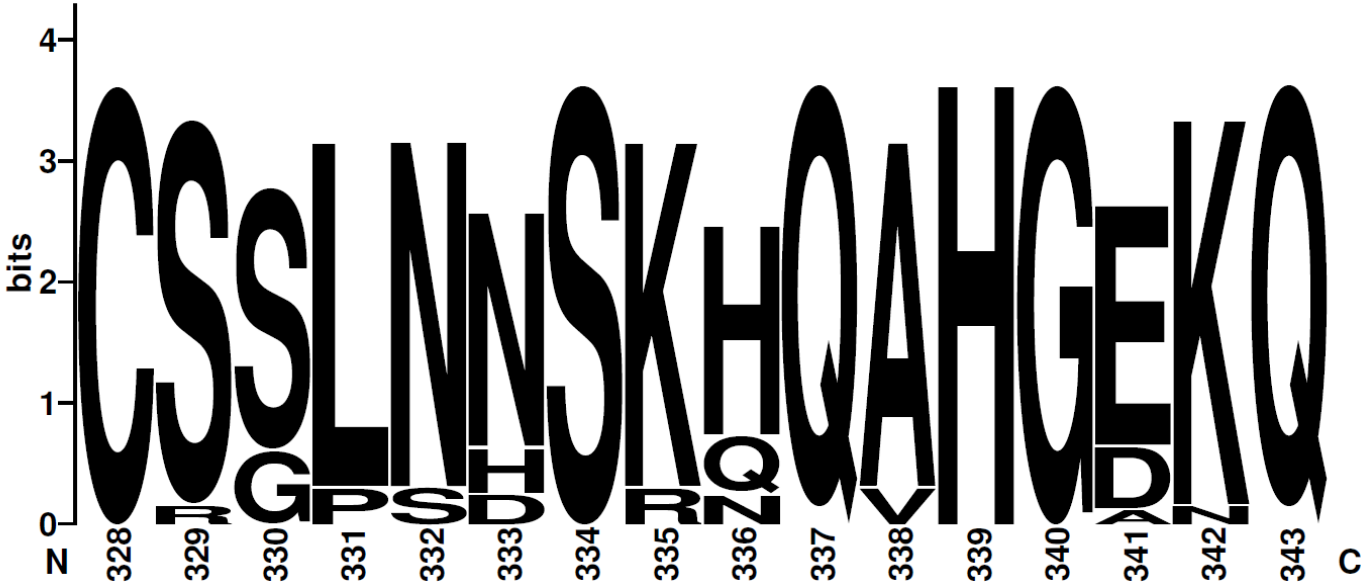

g)

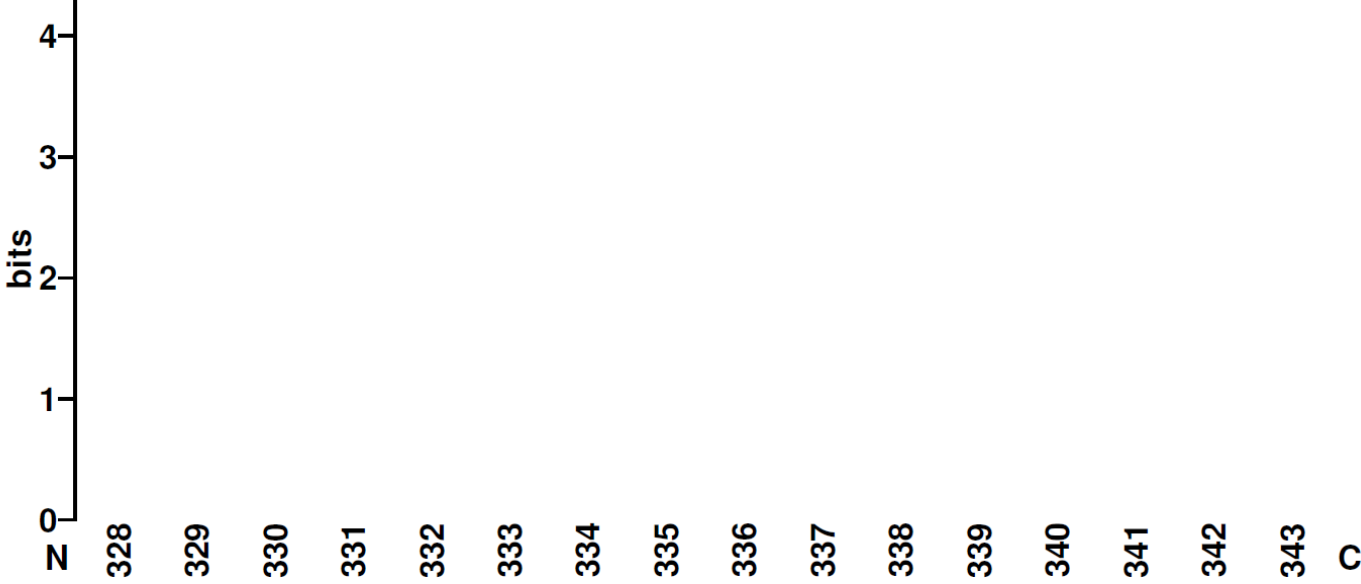

h)

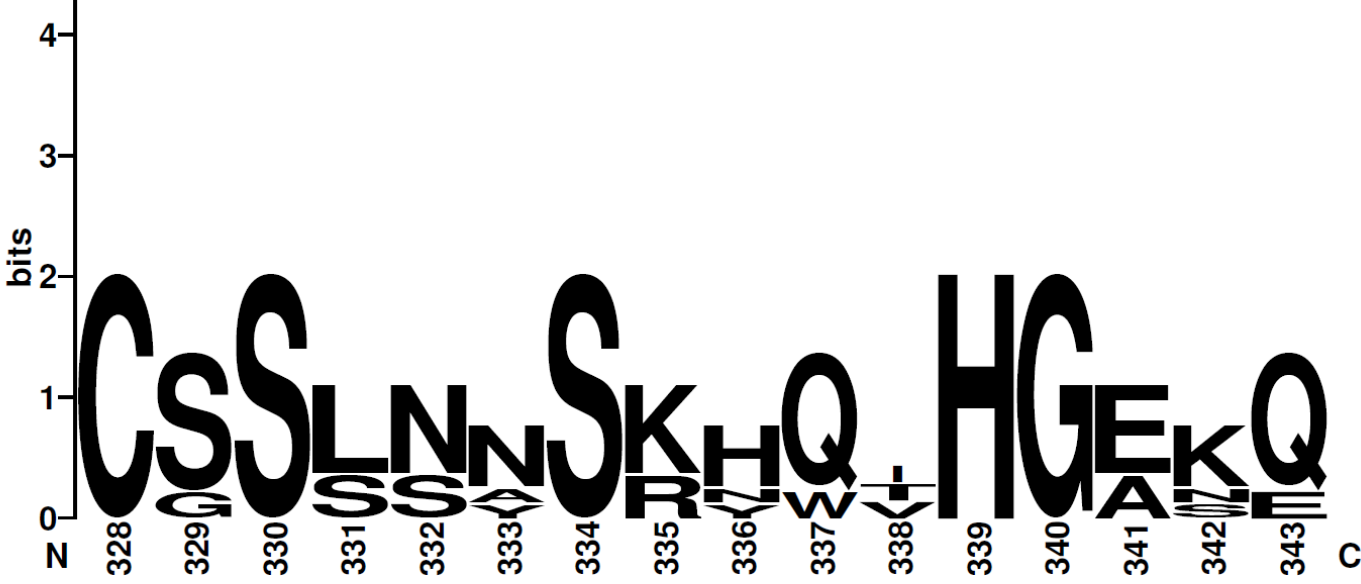

**Table S1** List of species examined in this study. This table provides information on the subfamily and family to which the species belong, whether the ZP3 sequence fragment was obtained in this study from specimens (in which case the acronym of the institution that provided the sample, and its voucher number if available, is given) or retrieved from Genbank, number of specimens sequenced per species (N), the accession numbers of the GenBank sequences, and the DNA and amino acid haplotypes found in each species. MTTU = Museum of Texas Tech University, USA; MNCN = Museo Nacional de Ciencias Naturales, Spain; CMPG = Institute of Ecology and Evolution, University of Bern, Switzerland; IZ-MLU = Institute of Zoology, Martin-Luther University, Germany; MUHNAC = Museu Nacional de História Natural e da Ciência, Portugal.

| Species                          | Subfamily,<br>Family       | Source             | N      | GenBank<br>accession<br>number                                                               | DNA<br>haplotype                                  | Amino<br>acid<br>haplotype |
|----------------------------------|----------------------------|--------------------|--------|----------------------------------------------------------------------------------------------|---------------------------------------------------|----------------------------|
| <i>Arvicola sapidus</i>          | Arvicolinae,<br>Cricetidae | MUHNAC             | 2      | MT226293                                                                                     | H1                                                | A1                         |
| <i>Chionomys nivalis</i>         |                            | CMPG               | 2      | MT226294                                                                                     | H2                                                | A2                         |
| <i>Lagurus lagurus</i>           |                            | GenBank            | -      | AF515621                                                                                     | H3                                                | A3                         |
| <i>Lasiopodomys brandti</i>      |                            | CMPG               | 1      | MT226295                                                                                     | H4                                                | A2                         |
| <i>Microtus agrestis</i>         |                            | MNCN<br>(ES-20909) | 1      | MT226296<br>MT226297                                                                         | H5<br>H6                                          | A2                         |
| <i>Microtus arvalis</i>          |                            | CMPG               | 2      | MT226298<br>MT226299<br>MT226300<br>MT226301<br>MT226302<br>MT226303<br>MT226304<br>MT226305 | H7<br>H8<br>H9<br>H10<br>H11<br>H12<br>H13<br>H14 | A2<br>A4                   |
| <i>Microtus cabreræ</i>          |                            | MUHNAC             | 3      | MT226306<br>MT226307                                                                         | H15<br>H16                                        | A5                         |
| <i>Microtus californicus</i>     |                            | CMPG               | 1      | MT226308                                                                                     | H17                                               | A2                         |
| <i>Microtus duodecimcostatus</i> |                            | MUHNAC             | 2<br>5 | MT226298<br>MT226301<br>MT226309                                                             | H7<br>H10<br>H18                                  | A2<br>A6                   |
| <i>Microtus felteni</i>          |                            | CMPG               | 1      | MT226298<br>MT226305                                                                         | H7<br>H14                                         | A2                         |
| <i>Microtus kikuchii</i>         |                            | CMPG               | 1      | MT226310<br>MT226311                                                                         | H19<br>H20                                        | A4                         |
| <i>Microtus lusitanicus</i>      |                            | MUHNAC             | 2<br>9 | MT226298<br>MT226312                                                                         | H7<br>H21                                         | A2                         |
| <i>Microtus montanus</i>         |                            | CMPG               | 2      | MT226313                                                                                     | H22                                               | A7                         |
| <i>Microtus montebelli</i>       |                            | CMPG               | 1      | MT226313                                                                                     | H22                                               | A7                         |
| <i>Microtus multiplex</i>        |                            | CMPG               | 2      | MT226314<br>MT226315                                                                         | H23<br>H24                                        | A8                         |
| <i>Microtus ochrogaster</i>      |                            | CMPG               | 2      | MT226316<br>MT226317                                                                         | H25<br>H26                                        | A2                         |

|                                     |                              |                                       |   |                                                                      |                                        |                                      |
|-------------------------------------|------------------------------|---------------------------------------|---|----------------------------------------------------------------------|----------------------------------------|--------------------------------------|
|                                     |                              |                                       |   | MT226318                                                             | H27                                    |                                      |
| <i>Microtus oeconomus</i>           |                              | CMPG                                  | 1 | MT226319                                                             | H28                                    | A9                                   |
| <i>Microtus richardsoni</i>         |                              | CMPG                                  | 1 | MT226310<br>MT226311                                                 | H19<br>H20                             | A4                                   |
| <i>Microtus rossiaemeridionalis</i> |                              | CMPG                                  | 2 | MT226298<br>MT226299                                                 | H7<br>H8                               | A2<br>A4                             |
| <i>Microtus schelkovnikovi</i>      |                              | CMPG                                  | 1 | MT226295                                                             | H4                                     | A2                                   |
| <i>Microtus socialis</i>            |                              | CMPG                                  | 2 | MT226320<br>MT226321<br>MT226322<br>MT226323<br>MT226324<br>MT226325 | H29<br>H30<br>H31<br>H32<br>H33<br>H34 | A2<br>A8<br>A10<br>A11<br>A12<br>A13 |
| <i>Microtus subterraneus</i>        |                              | CMPG                                  | 1 | MT226295                                                             | H4                                     | A2                                   |
| <i>Microtus tatricus</i>            |                              | CMPG                                  | 2 | MT226298                                                             | H7                                     | A2                                   |
| <i>Microtus thomasi</i>             |                              | CMPG                                  | 2 | MT226298                                                             | H7                                     | A2                                   |
| <i>Myodes glareolus</i>             |                              | MNCN<br>(MNCN-144800/<br>MNCN-144801) | 2 | MT226326                                                             | H35                                    | A14                                  |
| <i>Mesocricetus auratus</i>         | Cricetinae,<br>Cricetidae    | IZ-MLU                                | 2 | MT226280                                                             | H36                                    | A15                                  |
| <i>Phodopus campbelli</i>           |                              |                                       | 1 | MT226281                                                             | H37                                    | A16                                  |
| <i>Phodopus roborovskii</i>         |                              |                                       | 3 | MT226282                                                             | H38                                    | A17                                  |
| <i>Phodopus sungorus</i>            |                              |                                       | 3 | MT226283                                                             | H39                                    | A16                                  |
| <i>Nyctomys sumichrasti</i>         | Tylomyinae,<br>Cricetidae    | MTTU<br>(TK 19590 /<br>TK 113595)     | 2 | MT226284<br>MT226285<br>MT226286<br>MT226287<br>MT226288             | H40<br>H41<br>H42<br>H43<br>H44        | A18<br>A19<br>A20<br>A36<br>A37      |
| <i>Tylomys watsoni</i>              |                              | MTTU<br>(TK 136061)                   | 1 | MT226289                                                             | H45                                    | A21                                  |
| <i>Oryzomys couesi</i>              | Sigmodontinae,<br>Cricetidae | MTTU<br>(TK 92437)                    | 1 | MT226290<br>MT226291                                                 | H46<br>H47                             | A22                                  |
| <i>Sigmodon arizonae</i>            |                              | MTTU<br>(TK 112658)                   | 1 | MT226292                                                             | H48                                    | A23                                  |
| <i>Onychomys torridus</i>           | Neotominae,<br>Cricetidae    | GenBank                               | - | DQ668293+<br>DQ668343<br>DQ668292+<br>DQ668342                       | H49<br>H50                             | A24<br>A25                           |
| <i>Peromyscus aztecus</i>           |                              |                                       |   | DQ668245+<br>DQ668332                                                | H51                                    | A26                                  |
| <i>Peromyscus boylii</i>            |                              |                                       |   | DQ668250+<br>DQ668323                                                | H52                                    | A27                                  |
| <i>Peromyscus californicus</i>      |                              |                                       |   | DQ668253+<br>DQ668341                                                | H53                                    | A28                                  |

|                               |                     |         |   |                       |                          |            |
|-------------------------------|---------------------|---------|---|-----------------------|--------------------------|------------|
| <i>Peromyscus crinitus</i>    |                     |         |   | DQ668255+<br>DQ668306 | H54                      | A29        |
| <i>Peromyscus difficilis</i>  |                     |         |   | DQ668259+<br>DQ668313 | H55<br>H56<br>H57<br>H58 | A30<br>A31 |
| <i>Peromyscus eremicus</i>    |                     |         |   | DQ668262+<br>DQ668310 | H59                      | A32        |
| <i>Peromyscus eva</i>         |                     |         |   | DQ668263+<br>DQ668337 | H60                      | A32        |
| <i>Peromyscus fraterculus</i> |                     |         |   | DQ668264+<br>DQ668338 | H61                      | A32        |
| <i>Peromyscus gossypinus</i>  |                     |         |   | DQ668267+<br>DQ668319 | H62                      | A33        |
| <i>Peromyscus gratus</i>      |                     |         |   | EU568656              | H63                      | A34        |
| <i>Peromyscus leucopus</i>    |                     |         |   | DQ668270+<br>DQ668316 | H62<br>H64               | A33        |
| <i>Peromyscus maniculatus</i> |                     |         |   | DQ668276+<br>DQ668299 | H65<br>H66               | A33        |
| <i>Peromyscus melanophrys</i> |                     |         |   | DQ668279+<br>DQ668336 | H67                      | A35        |
| <i>Peromyscus mexicanus</i>   |                     |         |   | DQ668283+<br>DQ668330 | H68<br>H69               | A36<br>A37 |
| <i>Peromyscus polionotus</i>  |                     |         |   | EU489722              | H70                      | A38        |
| <i>Peromyscus truei</i>       |                     |         |   | EU568744              | H71                      | A39        |
| <i>Aethomys ineptus</i>       | Murinae,<br>Muridae | GenBank | - | EU004038              | H72                      | A40        |
| <i>Anisomys imitator</i>      |                     |         |   | EF364448              | H73                      | A41        |
| <i>Apodemus chevrieri</i>     |                     |         |   | EU004040              | H74                      | A42        |
| <i>Bandicota indica</i>       |                     |         |   | EU004041              | H75                      | A43        |
| <i>Bunomys andrewsi</i>       |                     |         |   | EU004042              | H76                      | A44        |
| <i>Chiruromys vates</i>       |                     |         |   | EF364449              | H77                      | A45        |
| <i>Coccymys ruemmleri</i>     |                     |         |   | EF364450              | H78                      | A46        |
| <i>Conilurus penicillatus</i> |                     |         |   | EF364451              | H79                      | A47        |
| <i>Crossomys moncktoni</i>    |                     |         |   | EF364452              | H80                      | A48        |
| <i>Dasymys incomtus</i>       |                     |         |   | EU004043              | H81                      | A49        |
| <i>Hydromys chrysogaster</i>  |                     |         |   | EF364453              | H82                      | A48        |
| <i>Hylomyscus alleni</i>      |                     |         |   | AY057789              | H83                      | A50        |
| <i>Hyomys goliath</i>         |                     |         |   | EF364454              | H84                      | A41        |
| <i>Leggadina forresti</i>     |                     |         |   | EF364455              | H85                      | A48        |
| <i>Lemniscomys griselda</i>   |                     |         |   | EU004044              | H86                      | A51        |
| <i>Leopoldamys sabanus</i>    |                     |         |   | EU004046              | H87                      | A52        |
| <i>Leporillus conditor</i>    |                     |         |   | EF364457              | H88                      | A53        |
| <i>Leptomys elegans</i>       |                     |         |   | EF364458              | H89                      | A48        |
| <i>Lorentzimys nouhuysi</i>   |                     |         |   | EF364459              | H90                      | S54        |
| <i>Macruromys major</i>       |                     |         |   | EF364460              | H91                      | A55        |



|                                 |  |  |  |          |      |     |
|---------------------------------|--|--|--|----------|------|-----|
| <i>Mallomys aroensis</i>        |  |  |  | EF364461 | H78  | A46 |
| <i>Mammelomys rattoides</i>     |  |  |  | EF364464 | H92  | A56 |
| <i>Mastacomys fuscus</i>        |  |  |  | EF364465 | H93  | A57 |
| <i>Mastomys hildebrandtii</i>   |  |  |  | AY057790 | H94  | A58 |
| <i>Maxomys bartelsii</i>        |  |  |  | EU004047 | H95  | A59 |
| <i>Melomys cervinipes</i>       |  |  |  | EF364469 | H96  | A60 |
| <i>Mesembriomys gouldii</i>     |  |  |  | EF364472 | H97  | A61 |
| <i>Micaelamys namaquensis</i>   |  |  |  | EU004039 | H98  | A62 |
| <i>Mus musculus</i>             |  |  |  | M20026   | H111 | A72 |
| <i>Niviventer fulvescens</i>    |  |  |  | EU004049 | H100 | A63 |
| <i>Notomys alexis</i>           |  |  |  | EF364474 | H99  | A57 |
| <i>Parahydromys asper</i>       |  |  |  | EF364479 | H101 | A48 |
| <i>Paramelomys rubex</i>        |  |  |  | EF364482 | H102 | A64 |
| <i>Paruromys dominator</i>      |  |  |  | EU004050 | H103 | A43 |
| <i>Pogonomys macrourus</i>      |  |  |  | EF364484 | H104 | A65 |
| <i>Pseudohydromys ellermani</i> |  |  |  | EF364466 | H82  | A48 |
| <i>Pseudomys laborifex</i>      |  |  |  | EF364499 | H105 | A66 |
| <i>Rhabdomys pumilio</i>        |  |  |  | EU004064 | H107 | A68 |
| <i>Rattus rattus</i>            |  |  |  | Y10823   | H106 | A67 |
| <i>Solomys salebrosus</i>       |  |  |  | EF364507 | H108 | A69 |
| <i>Uromys anak</i>              |  |  |  | EF364508 | H109 | A70 |
| <i>Xeromys myoides</i>          |  |  |  | EF364510 | H82  | A48 |
| <i>Zyzomys pedunculatus</i>     |  |  |  | EF364514 | H110 | A71 |

**Table S2** Detailed results of selection tests. For the PAML models, the log-likelihood ( $l$ ) of each model is given, as well as the position of positively selected codons (where  $\omega > 1$ ) identified by the Naive Empirical Bayes (NEB) and Bayes Empirical Bayes (BEB) methods. For the HyPhy tests, both positively and negatively selected sites are shown. Sites inferred to be under selection by the different site models in PAML or by the various site tests in HyPhy are underlined, while sites inferred to be under selection by the different site tests in both PAML and HyPhy are double underlined.  $p0$  = proportion of sites where  $\omega < 1$  ( $\omega_0$ ),  $p1$  = proportion of sites where  $\omega = 1$  ( $\omega_1$ ),  $p2$  = proportion of sites where  $\omega > 1$  ( $\omega_2$ ),  $p/q$  = parameters of the beta distribution, <sup>n</sup> = positively selected site identified by NEB, <sup>b</sup> = positively selected site identified by BEB, \* = probability > 95%, \*\* = probability > 99%, N.A. = not applicable.

| Dataset                    | Software | Model or test                 | Parameters                                                                                                                 | $\kappa$<br>(ts/tv) | Log-likelihood ( $l$ ) | Positively selected sites                                                                                                                                                                                                                                                                                                                           | Negatively selected sites |
|----------------------------|----------|-------------------------------|----------------------------------------------------------------------------------------------------------------------------|---------------------|------------------------|-----------------------------------------------------------------------------------------------------------------------------------------------------------------------------------------------------------------------------------------------------------------------------------------------------------------------------------------------------|---------------------------|
| Cricetidae<br>+<br>Murinae | PAML     | M0:<br>one ratio              | $\omega = 0.45307$                                                                                                         | 4.27867             | -2823.044887           | N.A.                                                                                                                                                                                                                                                                                                                                                | N.A.                      |
|                            |          | M1a:<br>nearly neutral        | $p0 = 0.69290$<br>$\omega_0 = 0.10473$<br>$p1 = 0.30710$<br>$\omega_1 = 1.00000$                                           | 4.19730             | -2715.812590           | N.A.                                                                                                                                                                                                                                                                                                                                                | N.A.                      |
|                            |          | M2a:<br>positive selection    | $p0 = 0.64858$<br>$\omega_0 = 0.10658$<br>$p1 = 0.25716$<br>$\omega_1 = 1.00000$<br>$p2 = 0.09426$<br>$\omega_2 = 2.74189$ | 4.77821             | -2697.066353           | <u>311</u> <sup>nb</sup><br><u>325</u> <sup>nb**</sup><br><u>336</u> <sup>nb*</sup><br><u>337</u> <sup>nb**</sup><br><u>341</u> <sup>nb**</sup><br><u>342</u> <sup>nb**</sup><br><u>346</u> <sup>nb</sup>                                                                                                                                           | N.A.                      |
|                            |          | M3:<br>discrete               | $p0 = 0.37891$<br>$\omega_0 = 0.00000$<br>$p1 = 0.46362$<br>$\omega_1 = 0.39586$<br>$p2 = 0.15747$<br>$\omega_2 = 2.05395$ | 4.56989             | -2686.221770           | <u>311</u> <sup>n**</sup><br><u>324</u> <sup>n**</sup><br><u>325</u> <sup>n**</sup><br><u>333</u> <sup>n</sup><br><u>335</u> <sup>n**</sup><br><u>336</u> <sup>n**</sup><br><u>337</u> <sup>n**</sup><br><u>338</u> <sup>n*</sup><br><u>341</u> <sup>n**</sup><br><u>342</u> <sup>n**</sup><br><u>346</u> <sup>n**</sup><br><u>347</u> <sup>n</sup> | N.A.                      |
|                            |          | M7:<br>beta                   | $p = 0.22452$<br>$q = 0.42241$                                                                                             | 4.07948             | -2708.700999           | N.A.                                                                                                                                                                                                                                                                                                                                                | N.A.                      |
|                            |          | M8:<br>beta and $\omega > 1$  | $p0 = 0.87831$<br>$p = 0.32736$<br>$q = 0.92237$<br>$p1 = 0.12169$<br>$\omega = 2.27682$                                   | 4.61074             | -2687.502429           | <u>311</u> <sup>nb</sup><br><u>324</u> <sup>nb</sup><br><u>325</u> <sup>nb**</sup><br><u>335</u> <sup>nb</sup><br><u>336</u> <sup>nb**</sup><br><u>337</u> <sup>nb**</sup><br><u>341</u> <sup>nb**</sup><br><u>342</u> <sup>nb**</sup><br><u>346</u> <sup>nb</sup>                                                                                  | N.A.                      |
|                            |          | M8a:<br>beta and $\omega = 1$ | $p0 = 0.79168$<br>$p = 0.46594$<br>$q = 2.64845$                                                                           | 4.05849             | -2705.263257           | N.A.                                                                                                                                                                                                                                                                                                                                                | N.A.                      |

|  |       |                                                    |                                      |       |              |                                                                  |                                                                                                                                                                                                                                                                         |
|--|-------|----------------------------------------------------|--------------------------------------|-------|--------------|------------------------------------------------------------------|-------------------------------------------------------------------------------------------------------------------------------------------------------------------------------------------------------------------------------------------------------------------------|
|  |       |                                                    | $pI = 0.20832$<br>$\omega = 1.00000$ |       |              |                                                                  |                                                                                                                                                                                                                                                                         |
|  |       | MA1,<br>foreground<br>branch<br>=<br>Murinae       | N.A.                                 | 4.383 | -1631.463527 | 315 <sup>bn</sup><br>322 <sup>bn</sup>                           | N.A.                                                                                                                                                                                                                                                                    |
|  |       | MA1,<br>foreground<br>branch<br>=<br>Cricetidae    | N.A.                                 | 4.082 | -1626.069192 | 287 <sup>bn</sup><br>307 <sup>bn*/**</sup><br>311 <sup>bn*</sup> | N.A.                                                                                                                                                                                                                                                                    |
|  |       | MA1,<br>foreground<br>branch<br>=<br>Arvicolinae   | N.A.                                 | 4.226 | -1628.893840 | 287 <sup>bn**</sup>                                              | N.A.                                                                                                                                                                                                                                                                    |
|  |       | MA1,<br>foreground<br>branch<br>=<br>Cricetinae    | N.A.                                 | 4.242 | -1631.709580 | 296 <sup>b</sup><br>309 <sup>b</sup>                             | N.A.                                                                                                                                                                                                                                                                    |
|  |       | MA1,<br>foreground<br>branch<br>=<br>Neotominae    | N.A.                                 | 4.237 | -1632.173401 | None                                                             | N.A.                                                                                                                                                                                                                                                                    |
|  |       | MA1,<br>foreground<br>branch<br>=<br>Sigmodontinae | N.A.                                 | 4.231 | -1632.171253 | None                                                             | N.A.                                                                                                                                                                                                                                                                    |
|  |       | MA1,<br>foreground<br>branch<br>=<br>Tylomyinae    | N.A.                                 | 4.162 | -1632.052340 | 307 <sup>b</sup><br>311 <sup>bn</sup>                            | N.A.                                                                                                                                                                                                                                                                    |
|  | HyPhy | SLAC                                               | N.A.                                 | N.A.  | N.A.         | <u>337*</u>                                                      | <u>287*</u><br><u>288**</u><br><u>289**</u><br><u>294**</u><br><u>295**</u><br><u>301**</u><br><u>302**</u><br><u>307*</u><br><u>312*</u><br><u>315*</u><br><u>323**</u><br><u>326**</u><br><u>328**</u><br><u>329*</u><br><u>334**</u><br><u>339**</u><br><u>354**</u> |
|  |       | FEL                                                | N.A.                                 | N.A.  | N.A.         | 317*<br>336*<br><u>337**</u>                                     | 280*<br>283*<br><u>287**</u><br>288*<br><u>289**</u><br>290*<br><u>294**</u><br><u>295**</u><br>296*<br><u>301**</u><br><u>302**</u><br><u>307**</u>                                                                                                                    |

|            |      |                              |                                                                                                                         |         |              |                                                                                                                                                                                                                                                                                                                              |                                                                                                                                                                                                                                                       |
|------------|------|------------------------------|-------------------------------------------------------------------------------------------------------------------------|---------|--------------|------------------------------------------------------------------------------------------------------------------------------------------------------------------------------------------------------------------------------------------------------------------------------------------------------------------------------|-------------------------------------------------------------------------------------------------------------------------------------------------------------------------------------------------------------------------------------------------------|
|            |      |                              |                                                                                                                         |         |              |                                                                                                                                                                                                                                                                                                                              | <u>312</u> **<br><u>315</u> **<br><u>323</u> **<br><u>326</u> **<br><u>328</u> **<br><u>334</u> **<br><u>339</u> **<br><u>354</u> **                                                                                                                  |
|            |      | MEME                         | N.A.                                                                                                                    | N.A.    | N.A.         | 336*<br><u>337</u> *                                                                                                                                                                                                                                                                                                         | N.A.                                                                                                                                                                                                                                                  |
|            |      | FUBAR                        | N.A.                                                                                                                    | N.A.    | N.A.         | 336**<br><u>337</u> **<br>342**                                                                                                                                                                                                                                                                                              | <u>287</u> **<br><u>289</u> **<br><u>294</u> **<br><u>295</u> *<br><u>301</u> *<br><u>302</u> **<br><u>307</u> *<br><u>312</u> **<br><u>315</u> *<br><u>323</u> *<br><u>326</u> **<br><u>328</u> *<br><u>334</u> **<br><u>339</u> **<br><u>354</u> ** |
| Cricetidae | PAML | M0:<br>one ratio             | $\omega = 0.40848$                                                                                                      | 4.11044 | -1840.140915 | N.A.                                                                                                                                                                                                                                                                                                                         | N.A.                                                                                                                                                                                                                                                  |
|            |      | M1a:<br>nearly neutral       | $p0 = 0.58454$<br>$\omega0 = 0.02766$<br>$p1 = 0.41546$<br>$\omega1 = 1.00000$                                          | 4.21389 | -1772.708134 | N.A.                                                                                                                                                                                                                                                                                                                         | N.A.                                                                                                                                                                                                                                                  |
|            |      | M2a:<br>positive selection   | $p0 = 0.58109$<br>$\omega0 = 0.02853$<br>$p1 = 0.35888$<br>$\omega1 = 1.00000$<br>$p2 = 0.06003$<br>$\omega2 = 2.11546$ | 4.31392 | -1772.345302 | <u>333</u> <sup>nb</sup><br><u>337</u> <sup>nb</sup>                                                                                                                                                                                                                                                                         | N.A.                                                                                                                                                                                                                                                  |
|            |      | M3:<br>discrete              | $p0 = 0.52941$<br>$\omega0 = 0.01315$<br>$p1 = 0.25547$<br>$\omega1 = 0.55291$<br>$p2 = 0.21512$<br>$\omega2 = 1.48408$ | 4.29966 | -1770.261410 | 296 <sup>n</sup><br>297 <sup>n</sup><br>308 <sup>n</sup><br>321 <sup>n</sup><br>324 <sup>n</sup><br>325 <sup>n*</sup><br><u>333</u> <sup>n**</sup><br>336 <sup>n</sup><br><u>337</u> <sup>n**</sup><br>338 <sup>n*</sup><br>341 <sup>n</sup><br>342 <sup>n</sup><br>344 <sup>n</sup><br>346 <sup>n</sup><br>347 <sup>n</sup> | N.A.                                                                                                                                                                                                                                                  |
|            |      | M7:<br>beta                  | $p = 0.09348$<br>$q = 0.14198$                                                                                          | 4.11249 | -1772.441428 | N.A.                                                                                                                                                                                                                                                                                                                         | N.A.                                                                                                                                                                                                                                                  |
|            |      | M8:<br>beta and $\omega > 1$ | $p0 = 0.88218$<br>$p = 0.12025$<br>$q = 0.27748$<br>$p1 = 0.11782$<br>$\omega = 1.70965$                                | 4.30832 | -1770.207833 | 293 <sup>b</sup><br>296 <sup>b</sup><br>297 <sup>b</sup><br>308 <sup>b</sup><br>317 <sup>b</sup><br>321 <sup>b</sup><br>324 <sup>b</sup><br>325 <sup>nb</sup><br>329 <sup>b</sup><br><u>333</u> <sup>nb</sup><br>336 <sup>nb</sup><br><u>337</u> <sup>nb*</sup>                                                              | N.A.                                                                                                                                                                                                                                                  |

|         |       |                               |                                                                                                                         |         |              |                                                                                                                                                                          |                                                                                                                                                                                                                     |
|---------|-------|-------------------------------|-------------------------------------------------------------------------------------------------------------------------|---------|--------------|--------------------------------------------------------------------------------------------------------------------------------------------------------------------------|---------------------------------------------------------------------------------------------------------------------------------------------------------------------------------------------------------------------|
|         |       |                               |                                                                                                                         |         |              | 338 <sup>nb</sup><br>341 <sup>nb</sup><br>342 <sup>nb</sup><br>344 <sup>b</sup><br>346 <sup>nb</sup><br>347 <sup>b</sup>                                                 |                                                                                                                                                                                                                     |
|         |       | M8a:<br>beta and $\omega = 1$ | $p0 = 0.64093$<br>$p = 0.18762$<br>$q = 2.45890$<br>$p1 = 0.35907$<br>$\omega = 1.00000$                                | 4.13917 | -1771.953080 | N.A.                                                                                                                                                                     | N.A.                                                                                                                                                                                                                |
|         | HyPhy | SLAC                          | N.A.                                                                                                                    | N.A.    | N.A.         | <u>337</u> *                                                                                                                                                             | <u>287</u> *<br><u>289</u> **<br>298*<br><u>301</u> **<br><u>312</u> *<br><u>323</u> *<br><u>326</u> **<br>330*<br><u>334</u> **<br><u>339</u> **<br><u>354</u> **                                                  |
|         |       | FEL                           | N.A.                                                                                                                    | N.A.    | N.A.         | 317*<br><u>337</u> *                                                                                                                                                     | <u>287</u> **<br><u>289</u> **<br>294*<br>295*<br>298*<br><u>301</u> **<br>307*<br><u>312</u> *<br>314*<br>315*<br>318*<br><u>323</u> **<br><u>326</u> **<br>328*<br><u>334</u> *<br><u>339</u> **<br><u>354</u> ** |
|         |       | MEME                          | N.A.                                                                                                                    | N.A.    | N.A.         | 297*<br><u>337</u> *                                                                                                                                                     | N.A.                                                                                                                                                                                                                |
|         |       | FUBAR                         | N.A.                                                                                                                    | N.A.    | N.A.         | <u>337</u> **                                                                                                                                                            | <u>287</u> **<br><u>289</u> *<br><u>301</u> *<br><u>312</u> *<br><u>323</u> *<br><u>326</u> **<br><u>334</u> **<br><u>339</u> **<br><u>354</u> **                                                                   |
| Murinae | PAML  | M0:<br>one ratio              | $\omega = 0.40348$                                                                                                      | 3.31445 | -1135.898833 | N.A.                                                                                                                                                                     | N.A.                                                                                                                                                                                                                |
|         |       | M1a:<br>nearly neutral        | $p0 = 0.76934$<br>$\omega0 = 0.07569$<br>$p1 = 0.23066$<br>$\omega1 = 1.00000$                                          | 3.06737 | -1095.799952 | N.A.                                                                                                                                                                     | N.A.                                                                                                                                                                                                                |
|         |       | M2a:<br>positive<br>selection | $p0 = 0.77312$<br>$\omega0 = 0.10194$<br>$p1 = 0.13762$<br>$\omega1 = 1.00000$<br>$p2 = 0.08926$<br>$\omega2 = 3.13645$ | 3.69926 | -1087.463200 | <u>311</u> <sup>nb</sup><br><u>325</u> <sup>nb**</sup><br><u>335</u> <sup>nb</sup><br><u>337</u> <sup>nb</sup><br><u>342</u> <sup>nb**</sup><br><u>346</u> <sup>nb</sup> | N.A.                                                                                                                                                                                                                |
|         |       | M3:<br>discrete               | $p0 = 0.48367$<br>$\omega0 = 0.00000$<br>$p1 = 0.39562$<br>$\omega1 = 0.36774$                                          | 3.70074 | -1084.433658 | 279 <sup>n</sup><br><u>311</u> <sup>n**</sup><br>324 <sup>n</sup><br><u>325</u> <sup>n**</sup>                                                                           | N.A.                                                                                                                                                                                                                |

|                 |       |                               |                                                                                                                         |         |              |                                                                                                                                                                                                                                                                  |                                                                                                                                                                                                                                                                                  |
|-----------------|-------|-------------------------------|-------------------------------------------------------------------------------------------------------------------------|---------|--------------|------------------------------------------------------------------------------------------------------------------------------------------------------------------------------------------------------------------------------------------------------------------|----------------------------------------------------------------------------------------------------------------------------------------------------------------------------------------------------------------------------------------------------------------------------------|
|                 |       |                               | $p2 = 0.12071$<br>$\omega2 = 2.68516$                                                                                   |         |              | <u>335</u> <sup>n**</sup><br><u>337</u> <sup>n*</sup><br><u>341</u> <sup>n</sup><br><u>342</u> <sup>n**</sup><br><u>346</u> <sup>n</sup>                                                                                                                         |                                                                                                                                                                                                                                                                                  |
|                 |       | M7:<br>beta                   | $p = 0.12345$<br>$q = 0.29286$                                                                                          | 3.11705 | -1095.892379 | N.A.                                                                                                                                                                                                                                                             | N.A.                                                                                                                                                                                                                                                                             |
|                 |       | M8:<br>beta and $\omega > 1$  | $p0 = 0.89108$<br>$p = 0.30707$<br>$q = 1.32853$<br>$p1 = 0.10892$<br>$\omega = 2.81543$                                | 3.69150 | -1085.310331 | <u>279</u> <sup>nb</sup><br><u>311</u> <sup>nb**/*</sup><br><u>324</u> <sup>n</sup><br><u>325</u> <sup>nb**</sup><br><u>335</u> <sup>nb*</sup><br><u>337</u> <sup>nb</sup><br><u>341</u> <sup>nb</sup><br><u>342</u> <sup>nb**</sup><br><u>346</u> <sup>nb</sup> | N.A.                                                                                                                                                                                                                                                                             |
|                 |       | M8a:<br>beta and $\omega = 1$ | $p0 = 0.80021$<br>$p = 0.41353$<br>$q = 3.92123$<br>$p1 = 0.19979$<br>$\omega = 1.00000$                                | 3.04708 | -1094.453451 | N.A.                                                                                                                                                                                                                                                             | N.A.                                                                                                                                                                                                                                                                             |
|                 | HyPhy | SLAC                          | N.A.                                                                                                                    | N.A.    | N.A.         | None                                                                                                                                                                                                                                                             | <u>289</u> <sup>*</sup><br><u>294</u> <sup>*</sup><br><u>295</u> <sup>*</sup><br><u>296</u> <sup>*</sup><br><u>302</u> <sup>**</sup><br><u>306</u> <sup>*</sup><br><u>327</u> <sup>*</sup><br><u>339</u> <sup>**</sup>                                                           |
|                 |       | FEL                           | N.A.                                                                                                                    | N.A.    | N.A.         | 342 <sup>*</sup>                                                                                                                                                                                                                                                 | <u>288</u> <sup>**</sup><br><u>289</u> <sup>**</sup><br><u>294</u> <sup>*</sup><br><u>295</u> <sup>*</sup><br><u>296</u> <sup>**</sup><br><u>302</u> <sup>**</sup><br><u>306</u> <sup>**</sup><br><u>307</u> <sup>*</sup><br><u>327</u> <sup>*</sup><br><u>339</u> <sup>**</sup> |
|                 |       | MEME                          | N.A.                                                                                                                    | N.A.    | N.A.         | <u>316</u> <sup>*</sup><br><u>342</u> <sup>*</sup>                                                                                                                                                                                                               | N.A.                                                                                                                                                                                                                                                                             |
|                 |       | FUBAR                         | N.A.                                                                                                                    | N.A.    | N.A.         | <u>355</u> <sup>**</sup><br><u>342</u> <sup>**</sup>                                                                                                                                                                                                             | <u>288</u> <sup>*</sup><br><u>289</u> <sup>*</sup><br><u>294</u> <sup>*</sup><br><u>295</u> <sup>*</sup><br><u>296</u> <sup>*</sup><br><u>302</u> <sup>**</sup><br><u>306</u> <sup>*</sup><br><u>339</u> <sup>**</sup>                                                           |
| <i>Microtus</i> | PAML  | M0:<br>one ratio              | $\omega = 0.15381$                                                                                                      | 5.07385 | -706.765944  | N.A.                                                                                                                                                                                                                                                             | N.A.                                                                                                                                                                                                                                                                             |
|                 |       | M1a:<br>nearly neutral        | $p0 = 0.90975$<br>$\omega0 = 0.00997$<br>$p1 = 0.09025$<br>$\omega1 = 1.00000$                                          | 4.70089 | -680.735490  | N.A.                                                                                                                                                                                                                                                             | N.A.                                                                                                                                                                                                                                                                             |
|                 |       | M2a:<br>positive<br>selection | $p0 = 0.91830$<br>$\omega0 = 0.01498$<br>$p1 = 0.05719$<br>$\omega1 = 1.00000$<br>$p2 = 0.02452$<br>$\omega2 = 4.30461$ | 5.07955 | -676.424362  | <u>297</u> <sup>nb</sup><br><u>337</u> <sup>nb**</sup>                                                                                                                                                                                                           | N.A.                                                                                                                                                                                                                                                                             |
|                 |       | M3:<br>discrete               | $p0 = 0.91526$<br>$\omega0 = 0.01413$<br>$p1 = 0.05823$<br>$\omega1 = 0.92183$<br>$p2 = 0.02652$                        | 5.03878 | -676.613865  | <u>297</u> <sup>n</sup><br><u>337</u> <sup>n**</sup>                                                                                                                                                                                                             | N.A.                                                                                                                                                                                                                                                                             |

|                   |       |                               |                                                                                                                            |         |             |                                                          |                                                                                                                                 |
|-------------------|-------|-------------------------------|----------------------------------------------------------------------------------------------------------------------------|---------|-------------|----------------------------------------------------------|---------------------------------------------------------------------------------------------------------------------------------|
|                   |       |                               | $\omega_2 = 4.03886$                                                                                                       |         |             |                                                          |                                                                                                                                 |
|                   |       | M7:<br>beta                   | $p = 0.01066$<br>$q = 0.07279$                                                                                             | 4.71871 | -680.839279 | N.A.                                                     | N.A.                                                                                                                            |
|                   |       | M8:<br>beta and $\omega > 1$  | $p0 = 0.96968$<br>$p = 0.03462$<br>$q = 0.51150$<br>$p1 = 0.03032$<br>$\omega = 3.80463$                                   | 5.01679 | -676.664233 | $\frac{297^{nb}}{337^{nb**}}$                            | N.A.                                                                                                                            |
|                   |       | M8a:<br>beta and $\omega = 1$ | $p0 = 0.90974$<br>$p = 1.03990$<br>$q = 99.00000$<br>$p1 = 0.09026$<br>$\omega = 1.00000$                                  | 4.69391 | -680.780313 | N.A.                                                     | N.A.                                                                                                                            |
|                   | HyPhy | SLAC                          | N.A.                                                                                                                       | N.A.    | N.A.        | $\frac{337^*}{337^*}$                                    | $\frac{291^{**}}{318^{**}}$<br>$\frac{326^*}{334^*}$<br>$\frac{339^*}{339^*}$                                                   |
|                   |       | FEL                           | N.A.                                                                                                                       | N.A.    | N.A.        | $\frac{337^*}{337^*}$                                    | $\frac{291^{**}}{303^*}$<br>$\frac{314^*}{315^*}$<br>$\frac{318^{**}}{326^*}$<br>$\frac{333^*}{334^*}$<br>$\frac{339^*}{339^*}$ |
|                   |       | MEME                          | N.A.                                                                                                                       | N.A.    | N.A.        | $\frac{337^*}{337^*}$                                    | N.A.                                                                                                                            |
|                   |       | FUBAR                         | N.A.                                                                                                                       | N.A.    | N.A.        | $\frac{337^{**}}{337^{**}}$                              | $\frac{291^{**}}{318^{**}}$<br>$\frac{326^{**}}{334^{**}}$<br>$\frac{339^*}{339^*}$                                             |
| <i>Peromyscus</i> | PAML  | M0:<br>one ratio              | $\omega = 0.35231$                                                                                                         | 3.83664 | -735.567226 | N.A.                                                     | N.A.                                                                                                                            |
|                   |       | M1a:<br>nearly neutral        | $p0 = 0.61897$<br>$\omega_0 = 0.00000$<br>$p1 = 0.38103$<br>$\omega_1 = 1.00000$                                           | 4.07239 | -728.070941 | N.A.                                                     | N.A.                                                                                                                            |
|                   |       | M2a:<br>positive<br>selection | $p0 = 0.61897$<br>$\omega_0 = 0.00000$<br>$p1 = 0.28498$<br>$\omega_1 = 1.00000$<br>$p2 = 0.09605$<br>$\omega_2 = 1.00000$ | 4.07238 | -728.070941 | 333 <sup>b</sup>                                         | N.A.                                                                                                                            |
|                   |       | M3:<br>discrete               | $p0 = 0.34058$<br>$\omega_0 = 0.00000$<br>$p1 = 0.27098$<br>$\omega_1 = 0.00000$<br>$p2 = 0.38844$<br>$\omega_2 = 0.94086$ | 4.02303 | -728.050079 | None                                                     | N.A.                                                                                                                            |
|                   |       | M7:<br>beta                   | $p = 0.01629$<br>$q = 0.02858$                                                                                             | 4.04372 | -728.072655 | N.A.                                                     | N.A.                                                                                                                            |
|                   |       | M8:<br>beta and $\omega > 1$  | $p0 = 0.87803$<br>$p = 0.01356$<br>$q = 0.03717$<br>$p1 = 0.12197$<br>$\omega = 1.00000$                                   | 4.04761 | -728.060149 | 333 <sup>n</sup><br>344 <sup>n</sup><br>346 <sup>n</sup> | N.A.                                                                                                                            |
|                   |       | M8a:<br>beta and $\omega = 1$ | $p0 = 0.61897$<br>$p = 0.00500$<br>$q = 74.14239$<br>$p1 = 0.38103$<br>$\omega = 1.00000$                                  | 4.07239 | -728.070936 | N.A.                                                     | N.A.                                                                                                                            |
|                   | HyPhy | SLAC                          | N.A.                                                                                                                       | N.A.    | N.A.        | None                                                     | $\frac{287^*}{289^*}$<br>$\frac{298^*}{298^*}$                                                                                  |

|  |  |       |      |      |      |      |                                                                                                                    |
|--|--|-------|------|------|------|------|--------------------------------------------------------------------------------------------------------------------|
|  |  |       |      |      |      |      | <u>323</u> **<br><u>328</u> *<br><u>354</u> *                                                                      |
|  |  | FEL   | N.A. | N.A. | N.A. | None | <u>287</u> **<br><u>289</u> **<br><u>298</u> **<br><u>323</u> **<br><u>326</u> *<br><u>328</u> **<br><u>354</u> ** |
|  |  | MEME  | N.A. | N.A. | N.A. | None | N.A.                                                                                                               |
|  |  | FUBAR | N.A. | N.A. | N.A. | None | <u>287</u> **<br><u>289</u> *<br><u>298</u> *<br><u>323</u> **<br><u>328</u> *<br><u>342</u> *<br><u>354</u> *     |
